# Supplementary material for: Coralline algal physiology is more adversely affected by elevated temperature than reduced pH
Source: PubMed Central journal article supplement (PMC4704045; doi:10.1038/srep19030), 2016-01-07
Supplement: srep19030-s1.pdf [file srep19030-s1.pdf]

Supporting information: Román Manuel Vásquez-Elizondo and Susana Enríquez

## **Coralline algal physiology is more adversely affected by elevated temperature than reduced pH**

### **Methods**

#### *Physiological determinations:*

Photosynthesis-irradiance curves (P vs E) were determined following the methodology described by Enríquez *et al.* (2002) and Cayabyab and Enríquez (2007). Four to six replicates (organisms) were used for the determination of each experimental curve. Each sample was exposed sequentially to 14-15 light treatments for 10-15 min, from dark conditions (dark respiration  $R_D$ , 15 min.) to a progressive increase in the irradiance levels. Oxygen evolution was monitored continuously and the slope of the changes observed was used to calculate the rate of oxygen evolution or consumption at each treatment. After exposing the samples to the different irradiances, oxygen evolution was measured again in the dark to determine the post-illumination respiration ( $R_L$ ). The maximum photosynthetic rate ( $P_{max}$ ) was calculated from the average maximum values above saturating irradiance  $E_k$  ( $n=3-4$ ). The linear slope of the curve ( $\alpha$ ) was estimated using a least-squares regression analysis, for the values under subsaturating irradiance that showed a linear increase with irradiance. Finally, saturation and compensation irradiances were calculated as the ratio of  $P_{max}:\alpha$  and  $R_D:\alpha$ . Data is presented as gross photosynthesis subtracting the  $R_D$  to the net photosynthesis values.

**Figure S1:**

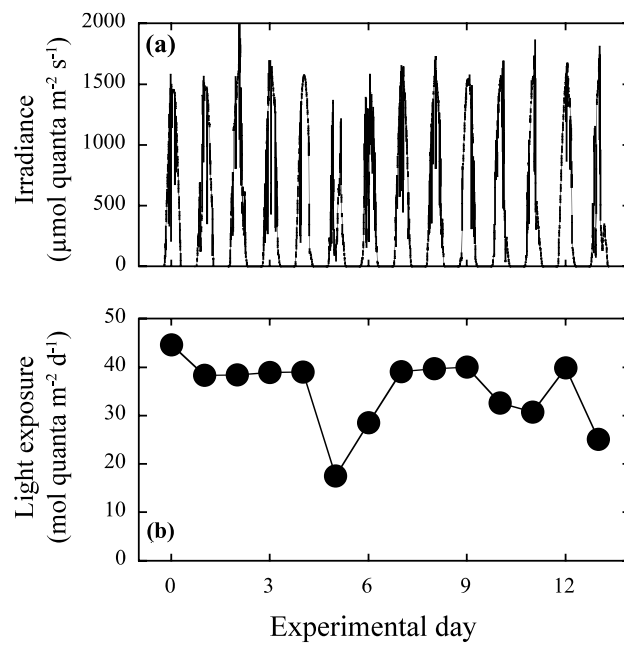

**Figure S1. Variation in surface solar radiation during the experiment.** Variation in diurnal surface irradiance (a) and variation in daily light exposure at the surface (b). Data from the Oceanographic and Meteorological Academic Service (SAMMO) of the UASA-UNAM.

**Figure S2:**

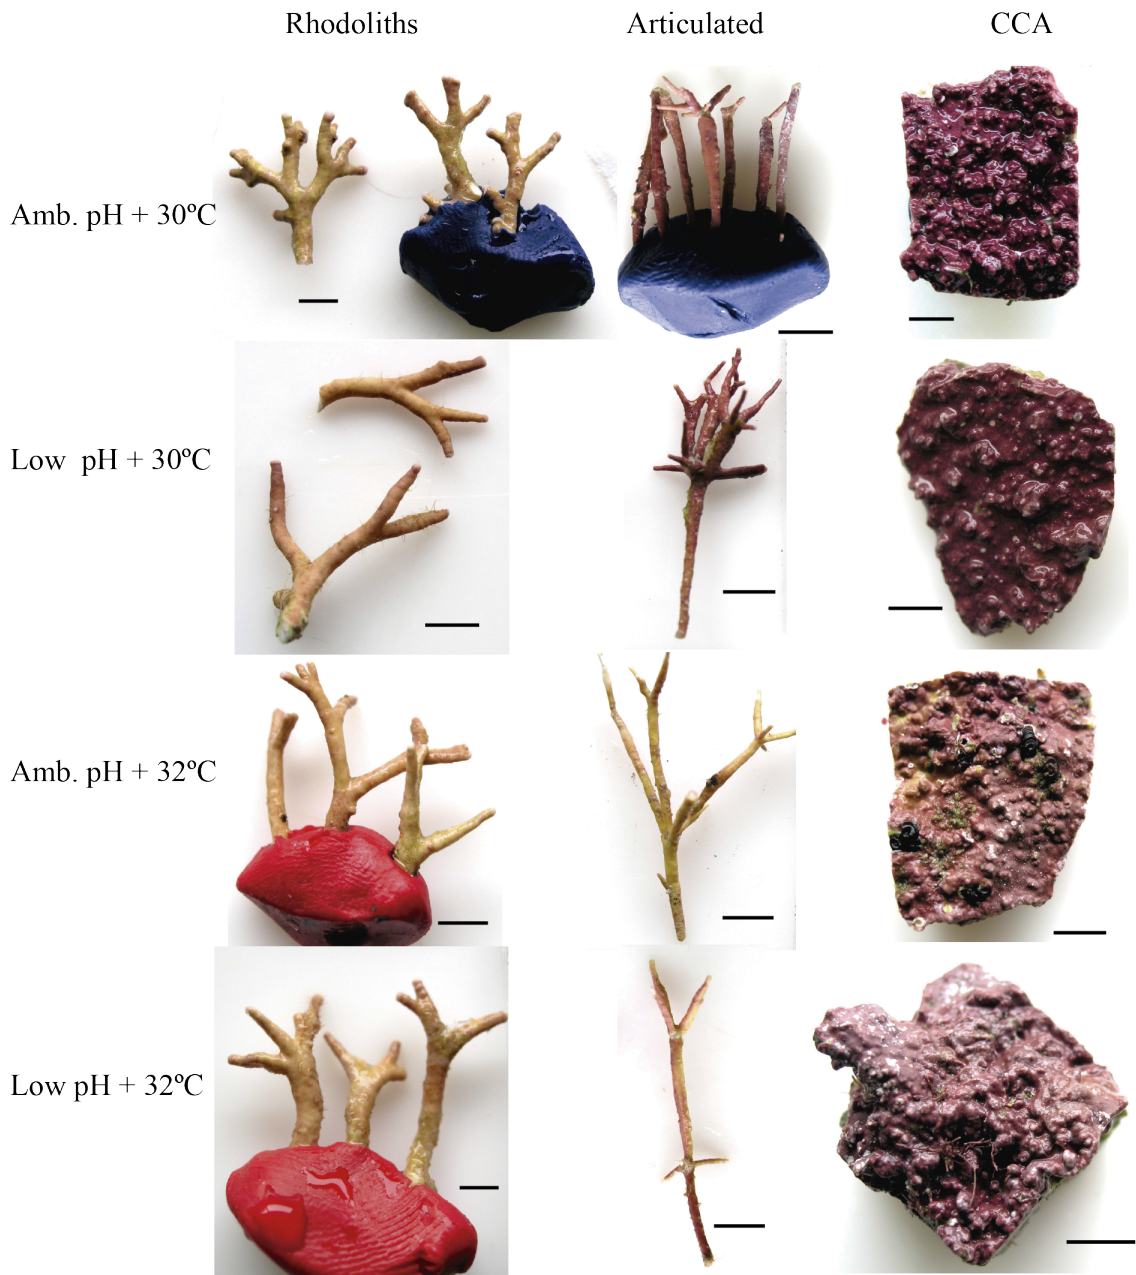

**Figure S2. Changes in thallus coloration of the experimental organisms exposed to low pH and thermal stress.** Control temperature = 30°C, Amb pH = ~ 8.1; Thermal stress = 32°C and low pH = 7.9.

**Table S1:** Physiological parameters derived from the photosynthesis vs irradiance curve (P vs E curve). Different letters indicate statistical differences among coralline morphotypes (One-way ANOVA,  $P < 0.05$ , Tukey Post-hoc  $P < 0.05$ ).

|                                                                                                                                | Rhodoliths           | Articulated          | CCA                  |
|--------------------------------------------------------------------------------------------------------------------------------|----------------------|----------------------|----------------------|
| $P_{\max}$ ( $\mu\text{mol O}_2 \text{ cm}^{-2} \text{ h}^{-1}$ )                                                              | $2.32 \pm 0.11^a$    | $1.73 \pm 0.16^b$    | $0.75 \pm 0.008^c$   |
| Alpha ( $\mu\text{mol O}_2 \text{ cm}^{-2} \text{ h}^{-1}$ )<br>( $\mu\text{mol quanta m}^{-2} \text{ s}^{-1}$ ) <sup>-1</sup> | $0.009 \pm 0.0003^a$ | $0.015 \pm 0.0001^b$ | $0.016 \pm 0.0001^b$ |
| $E_k$                                                                                                                          | $255 \pm 9.3^a$      | $118 \pm 15.9^b$     | $46.3 \pm 1.9^c$     |
| $R_L$ ( $\mu\text{mol O}_2 \text{ cm}^{-2} \text{ h}^{-1}$ )                                                                   | $0.76 \pm 0.12^a$    | $0.77 \pm 0.10^a$    | $0.43 \pm 0.06^b$    |

**Table S2.** Least-square regression analyses for the description of the  $Q_{10}$  factor for each metabolic rate and coralline species (short-term incubations). Significant differences between slopes are indicated with different letters.

| Metabolic rate          | Morphotype  | Slope               | SE    | $R^2$ | $P$    | n  |
|-------------------------|-------------|---------------------|-------|-------|--------|----|
| Post illumination       |             |                     |       |       |        |    |
| respiration ( $R_L$ )   |             |                     |       |       |        |    |
|                         | Rhodoliths  | $0.098 \pm 0.010^a$ | 0.157 | 0.76  | <0.001 | 30 |
|                         | Articulated | $0.088 \pm 0.008^a$ | 0.126 | 0.79  | <0.001 | 30 |
|                         | CCA         | $0.027 \pm 0.004^b$ | 0.039 | 0.69  | <0.001 | 24 |
| Maximum calcification   |             |                     |       |       |        |    |
| rate ( $G_{max}$ )      |             |                     |       |       |        |    |
|                         | Rhodoliths  | $0.040 \pm 0.008^a$ | 0.127 | 0.46  | <0.001 | 27 |
|                         | Articulated | $0.033 \pm 0.007^b$ | 0.092 | 0.49  | <0.001 | 23 |
|                         | CCA         | $0.018 \pm 0.003^c$ | 0.033 | 0.60  | <0.001 | 21 |
| Gross photosynthesis    |             |                     |       |       |        |    |
| ( $P_{max}$ )           |             |                     |       |       |        |    |
|                         | Rhodoliths  | $0.276 \pm 0.032^a$ | 0.346 | 0.77  | <0.001 | 23 |
|                         | Articulated | $0.150 \pm 0.058^b$ | 0.303 | 0.55  | <0.001 | 24 |
|                         | CCA         | $0.057 \pm 0.004^c$ | 0.079 | 0.72  | <0.001 | 24 |
| Photosynthesis          |             |                     |       |       |        |    |
| respiration ratio (P:R) |             |                     |       |       |        |    |
|                         | Rhodoliths  | $-0.098 \pm 0.028$  | 0.434 | 0.77  | 0.002  | 29 |
|                         | Articulated | $-0.221 \pm 0.044$  | 0.303 | 0.67  | 0.001  | 30 |
|                         | CCA         | -                   | -     | -     | 0.203  | 30 |

**Table S3.** ANCOVA analyses testing the differences among species in the colinearity observed between different metabolic rates.

| Metabolic rate |                           | <i>df</i>    | MS    | F     | <i>P</i>        |
|----------------|---------------------------|--------------|-------|-------|-----------------|
| $P_{\max}$     | Rhodoliths vs Articulated | <i>1, 43</i> | 0.949 | 8.85  | <b>0.05</b>     |
|                | Rhodoliths vs CCA         | <i>1, 43</i> | 2.88  | 46.51 | <b>0.001</b>    |
|                | Articulated vs CCA        | <i>1, 44</i> | 2.88  | 10.68 | <b>0.002</b>    |
| $R_L$          | Rhodoliths vs Articulated | <i>1, 56</i> | 0.015 | 0.727 | 0.397           |
|                | Rhodoliths vs CCA         | <i>1, 50</i> | 0.456 | 26.71 | <b>&lt;0.05</b> |
|                | Articulated vs CCA        | <i>1, 50</i> | 0.456 | 30.73 | <b>&lt;0.05</b> |
| $G_{\max}$     | Rhodoliths vs Articulated | <i>1, 43</i> | 0.949 | 8.95  | <b>&lt;0.05</b> |
|                | Rhodoliths vs CCA         | <i>1, 43</i> | 2.88  | 46.55 | <b>&lt;0.05</b> |
|                | Articulated vs CCA        | <i>1, 44</i> | 0.527 | 10.68 | <b>&lt;0.05</b> |

**Table S4.** Carbonate chemistry for the different experimental treatments. For temperature and pH n=14 (daily averages). Carbonate system parameters n=8 ( $\pm$  SE).

| Treatment                        | Temperature<br>(°C) | pH <sub>NBS</sub> | Total<br>alkalinity<br>( $\mu\text{mol kg}^{-1}$ ) | $PCO_2$<br>( $\mu\text{atm}$ ) | $TCO_2$<br>( $\mu\text{mol kg}^{-1}$ ) | $\Omega_{\text{cal}}$ | $CO_3$<br>( $\mu\text{mol kg}^{-1}$ ) |
|----------------------------------|---------------------|-------------------|----------------------------------------------------|--------------------------------|----------------------------------------|-----------------------|---------------------------------------|
| Ambient<br>pH, 30°C<br>(Control) | 29.98 $\pm$ 0.07    | 8.12 $\pm$ 0.004  | 2333.3 $\pm$ 8.9                                   | 488.1 $\pm$ 7.1                | 2029.2 $\pm$ 9.7                       | 5.32 $\pm$ 0.03       | 218.8 $\pm$ 1.4                       |
| Low pH,<br>30°C                  | 30 $\pm$ 0.04       | 7.89 $\pm$ 0.001  | 2315 $\pm$ 13.1                                    | 902.4 $\pm$ 7.8                | 2133.3 $\pm$ 13.1                      | 3.45 $\pm$ 0.01       | 141.9 $\pm$ 0.6                       |
| Ambient<br>pH, 32°C              | 31.95 $\pm$ 0.06    | 8.18 $\pm$ 0.01   | 2317 $\pm$ 17.8                                    | 415.23 $\pm$ 16.9              | 1962.8 $\pm$ 23                        | 6.12 $\pm$ 0.07       | 250.9 $\pm$ 3                         |
| Low pH,<br>32°C                  | 32 $\pm$ 0.03       | 7.9 $\pm$ 0.0004  | 2304.5 $\pm$ 17.8                                  | 895 $\pm$ 7.1                  | 2109.2 $\pm$ 16.8                      | 3.66 $\pm$ 0.02       | 150.1 $\pm$ 1.2                       |

**Table S5.** Variation in the photosynthetic pigments of the experimental organisms exposed for 10 days to different experimental treatments. Chlorophyll *a* and Antennae pigments such as Phycoerythrin + Phycocyanin + Allophycocyanin, are expressed in mg pigment m<sup>-2</sup>. Data describe the average ±SEM of n=6-8 replicates. ND denote the lack of data, as we lost during the preservation the experimental CCA organisms exposed to low pH + 30°C. Different letters indicate significant differences among treatments (One way ANOVA, Tukey HSD, P<0.05)

|                 | Amb pH +<br>30°C         | Low pH +<br>30°C         | Amb pH +<br>32°C         | Low pH +<br>32°C         |
|-----------------|--------------------------|--------------------------|--------------------------|--------------------------|
| <i>Chl a</i>    |                          |                          |                          |                          |
| Rhodoliths      | 20.8± 2.2                | 19.3± 1.6                | 15.5± 1.7                | 15.1± 1.6                |
| Articulated     | 72.9± 5.3 <sup>ab</sup>  | 76± 5.3 <sup>a</sup>     | 31.6± 3.6 <sup>c</sup>   | 55± 2.1 <sup>b</sup>     |
| CCA             | 88.6± 9.4 <sup>a</sup>   | ND                       | 55.6± 4 <sup>b</sup>     | 63.1± 10.6 <sup>b</sup>  |
| <i>Antennae</i> |                          |                          |                          |                          |
| Rhodoliths      | 81.9± 5.8                | 81.5± 6.7                | 67.2± 10.9               | 73.5± 5.1                |
| Articulated     | 492.6± 36.7 <sup>a</sup> | 495.9± 22.1 <sup>a</sup> | 319.3± 30.5 <sup>b</sup> | 394.6± 19.4 <sup>a</sup> |
| CCA             | 674.1± 92.9 <sup>a</sup> | ND                       | 348.8± 46.3 <sup>b</sup> | 432.9± 60.7 <sup>a</sup> |

**Table S6.** Two-way ANOVA tests analyzing direct and combined effects of low pH and thermal-stress (+2°C) on maximum photochemical efficiency (F<sub>v</sub>/F<sub>m</sub>) at the end of the experiment on the three coralline species: *Neogoniolithon sp.* (rhodolith), *Amphiroa tribulus* (articulated) and the CCA *Lithothamnion sp.*

| Source of Variation | Rhodoliths |       |      |              | Articulated |                      |        |                 | CCA |        |      |                 |
|---------------------|------------|-------|------|--------------|-------------|----------------------|--------|-----------------|-----|--------|------|-----------------|
|                     | df         | MS    | F    | P            | df          | MS                   | F      | P               | df  | MS     | F    | P               |
| Temp                | 1          | 0.082 | 12.4 | <b>0.002</b> | 1           | 0.24                 | 73.42  | <b>&lt;0.01</b> | 1   | 0.14   | 47.3 | <b>&lt;0.01</b> |
| pH                  | 1          | 0.001 | 0.15 | 0.695        | 1           | 0.007                | 2.175  | 0.154           | 1   | 0.012  | 4.16 | 0.054           |
| pH*temp.            | 1          | 0.003 | 0.38 | 0.541        | 1           | 1.5*10 <sup>-6</sup> | <0.001 | 0.983           | 1   | <0.001 | 0.05 | 0.811           |
| Error               | 20         | 0.131 |      |              | 26          | 0.07                 |        |                 | 25  | 0.065  |      |                 |

**Table S7.** T-test analyses for the comparison of the control organisms (ambient pH + 30°C, day 10) between initial (day 0) and final experimental day.

| <i>Metabolic rate</i> |             | df | <i>t</i> | <i>P</i> |
|-----------------------|-------------|----|----------|----------|
| $P_{\max}$            | Rhodoliths  | 13 | 0.052    | 0.959    |
|                       | Articulated | 13 | 1.65     | 0.123    |
|                       | CCA         | 14 | -0.74    | 0.46     |
| $R_L$                 | Rhodoliths  | 13 | -0.98    | 0.36     |
|                       | Articulated | 13 | 1.5      | 0.148    |
|                       | CCA         | 14 | -0.6     | 0.556    |
| $G_{\max}$            | Rhodoliths  | 10 | 0.447    | 0.665    |
|                       | Articulated | 9  | 0.821    | 0.433    |
|                       | CCA         | 10 | 0.774    | 0.457    |

**Table S8.** Two-way ANOVA test for the analysis of the tank effect of this experimental approach, for the different metabolic rates and coralline algal species analysed.

|            |             | df    | SM    | F     | <i>P</i> |
|------------|-------------|-------|-------|-------|----------|
| $P_{\max}$ | Rhodoliths  | 4,20  | 0.19  | 1.11  | 0.359    |
|            | Articulated | 4,18  | 0.15  | 0.003 | 0.954    |
|            | CCA         | 4,21  | 0.01  | 1.39  | 0.27     |
| $R_L$      | Rhodoliths  | 4,20  | 0.048 | 1.3   | 0.301    |
|            | Articulated | 4, 18 | 0.026 | 0.73  | 0.579    |
|            | CCA         | 4,21  | 0.003 | 1.18  | 0.346    |
| $G_{\max}$ | Rhodoliths  | 4,12  | 0.023 | 0.017 | 0.899    |
|            | Articulated | 4, 17 | 0.004 | 2.18  | 0.115    |
|            | CCA         | 4,19  | 0.002 | 1.15  | 0.363    |
